# Supplementary material for: Furan containing ammonium salts from furfural: synthesis and properties evaluation
Source: Royal Society of Chemistry journal article supplement (doi:10.1039/b902855b), 2009-01-01

## Electronic Supplementary Information (ESI)

### Experimental procedure and characterization of products **5a-c**, **6a-c**, and **7a-d**.

**N-Butylfurfurylimine 5a.** Freshly distilled furfural **1** (4.30 cm<sup>3</sup>, 52 mmol) is charged in a two necked round bottom flask under N<sub>2</sub>; then anhydrous MgSO<sub>4</sub> (3.13 g, 26 mmol) is added, followed by butylamine (5.14 cm<sup>3</sup>, 52 mmol). The exothermic reaction is monitored by means of TLC and GC-MS; after 2 hours the conversion is complete. Imine **5a** is obtained by distillation under reduced pressure (T<sub>eb</sub> = 60°C, p = 10 mbar) as a colourless liquid (7.7 g, 98%). <sup>1</sup>H NMR (400 MHz, CDCl<sub>3</sub>): δ = 0.94 (t, <sup>3</sup>J (H, H) = 7.2 Hz, 3H, N(CH<sub>2</sub>)<sub>3</sub>CH<sub>3</sub>), 1.33-1.42 (m, 2H, N(CH<sub>2</sub>)<sub>2</sub>CH<sub>2</sub>CH<sub>3</sub>), 1.66-1.71 (m, 2H, NCH<sub>2</sub>CH<sub>2</sub>CH<sub>2</sub>CH<sub>3</sub>), 3.58 (t, <sup>3</sup>J (H, H) = 6.8 Hz, 2H, NCH<sub>2</sub>(CH<sub>2</sub>)<sub>2</sub>CH<sub>3</sub>), 6.47 (dd, <sup>3</sup>J (H, H) = 1.8 Hz, <sup>3</sup>J (H, H) = 3.2 Hz, 1H, 4-H furan), 6.72 (d, <sup>3</sup>J (H, H) = 3.2 Hz, 1H, 3-H furan), 7.50 (d, <sup>3</sup>J (H, H) = 1.8 Hz, 1H, 5-H furan), 8.08 ppm (s, 1H, N=CH); GC rt 17.4 min; MS (70 eV, EI): m/z 151 (20) [M<sup>+</sup>]; 122 (75) [M<sup>+</sup> - CH<sub>3</sub>CH<sub>2</sub>]; 108 (100) [M<sup>+</sup> - CH<sub>3</sub>(CH<sub>2</sub>)<sub>2</sub>]; 94 (25) [M<sup>+</sup> - CH<sub>3</sub>(CH<sub>2</sub>)<sub>3</sub>]; 81 (100) [M<sup>+</sup> - CH<sub>3</sub>(CH<sub>2</sub>)<sub>3</sub>N]; 67 (6) [M<sup>+</sup> - CH<sub>3</sub>(CH<sub>2</sub>)<sub>3</sub>NCH]; 53 (20).

**N-Octylfurfurylimine 5b.** The imine is prepared from **1a** and octylamine in 98% yield after distillation under reduced pressure (T<sub>eb</sub> = 95°C, p = 9 · 10<sup>-2</sup> mbar) with the same procedure of compound **5a**. <sup>1</sup>H NMR (200 MHz, CDCl<sub>3</sub>): δ = 0.88 (t, <sup>3</sup>J (H, H) = 6.2 Hz, 3H, N(CH<sub>2</sub>)<sub>7</sub>CH<sub>3</sub>), 1.28-1.31 (m, 10H, N(CH<sub>2</sub>)<sub>2</sub>(CH<sub>2</sub>)<sub>5</sub>CH<sub>3</sub>), 1.68-1.75 (m, 2H, NCH<sub>2</sub>CH<sub>2</sub>(CH<sub>2</sub>)<sub>5</sub>CH<sub>3</sub>), 3.58 (t, <sup>3</sup>J (H, H) = 7.4 Hz, 2H, NCH<sub>2</sub>(CH<sub>2</sub>)<sub>6</sub>CH<sub>3</sub>), 6.47 (dd, <sup>3</sup>J (H, H) = 1.6 Hz, <sup>3</sup>J (H, H) = 3.2 Hz, 1H, 4-H furan), 6.72 (d, <sup>3</sup>J (H, H) = 3.2 Hz, 1H, 3-H furan), 7.51 (d, <sup>3</sup>J (H, H) = 1.6 Hz, 1H, 5-H furan), 8.08 (s, 1H, N=CH); GC rt 18.2 min; MS (70 eV, EI): m/z 207 (5) [M<sup>+</sup>]; 192 (3) [M<sup>+</sup> - CH<sub>3</sub>]; 178 (15) [M<sup>+</sup> - CH<sub>3</sub>CH<sub>2</sub>]; 164 (30) [M<sup>+</sup> - CH<sub>3</sub>(CH<sub>2</sub>)<sub>2</sub>]; 150 (100) [M<sup>+</sup> - CH<sub>3</sub>(CH<sub>2</sub>)<sub>3</sub>]; 136 (10) [M<sup>+</sup> - CH<sub>3</sub>(CH<sub>2</sub>)<sub>4</sub>]; 122 (45) [M<sup>+</sup> - CH<sub>3</sub>(CH<sub>2</sub>)<sub>5</sub>]; 108 (60) [M<sup>+</sup> - CH<sub>3</sub>(CH<sub>2</sub>)<sub>6</sub>]; 94 (25) [M<sup>+</sup> - CH<sub>3</sub>(CH<sub>2</sub>)<sub>7</sub>]; 80 (50) [M<sup>+</sup> - CH<sub>3</sub>(CH<sub>2</sub>)<sub>7</sub>N]; 67 (5) [M<sup>+</sup> - CH<sub>3</sub>(CH<sub>2</sub>)<sub>7</sub>NCH]; 53 (15).

**N-Hexylfurfurylimine 5c.** The imine is prepared from **1a** hexylamine in 97% yield after distillation under reduced pressure (T<sub>eb</sub> = 90°C, p = 1 · 10<sup>-1</sup> mbar) with the same procedure of compound **5a**. <sup>1</sup>H NMR (200 MHz, CDCl<sub>3</sub>): δ = 0.88 (t, <sup>3</sup>J (H, H) = 3.2 Hz, 3H, N(CH<sub>2</sub>)<sub>5</sub>CH<sub>3</sub>), 1.23-1.38 (m, 6H, N(CH<sub>2</sub>)<sub>2</sub>(CH<sub>2</sub>)<sub>3</sub>CH<sub>3</sub>), 1.65-1.75 (m, 2H, NCH<sub>2</sub>CH<sub>2</sub>(CH<sub>2</sub>)<sub>3</sub>CH<sub>3</sub>), 3.56 (t, <sup>3</sup>J (H, H) = 4.6 Hz, 2H, NCH<sub>2</sub>(CH<sub>2</sub>)<sub>4</sub>CH<sub>3</sub>), 6.46 (dd, <sup>3</sup>J (H, H) = 1.2 Hz, <sup>3</sup>J (H, H) = 2.2 Hz,

1H, 4-H furan), 6.71 (d, <sup>3</sup>J (H, H) = 2.2 Hz, 1H, 3-H furan), 7.50 (d, <sup>3</sup>J (H, H) = 1.2 Hz, 1H, 5-H furan), 8.07 (s, 1H, N=CH); GC rt 15.6 min; MS (70 eV, EI): m/z 179 (5) [M<sup>+</sup>]; 164 (10) [M<sup>+</sup> - CH<sub>3</sub>]; 150 (100) [M<sup>+</sup> - CH<sub>3</sub>CH<sub>2</sub>]; 136 (10) [M<sup>+</sup> - CH<sub>3</sub>(CH<sub>2</sub>)<sub>2</sub>]; 122 (60) [M<sup>+</sup> - CH<sub>3</sub>(CH<sub>2</sub>)<sub>3</sub>]; 108 (70) [M<sup>+</sup> - CH<sub>3</sub>(CH<sub>2</sub>)<sub>4</sub>]; 94 (35) [M<sup>+</sup> - CH<sub>3</sub>(CH<sub>2</sub>)<sub>5</sub>]; 80 (75) [M<sup>+</sup> - CH<sub>3</sub>(CH<sub>2</sub>)<sub>5</sub>N]; 67 (5) [M<sup>+</sup> - CH<sub>3</sub>(CH<sub>2</sub>)<sub>5</sub>NCH]; 53 (15).

**N-Butylfurfurylamine 6a.** Freshly distilled imine **5a** (7.55 g, 50 mmol) is charged in a two necked round bottom flask with Pd/C 10 wt % (750 mg) and connected to a rubber balloon filled with H<sub>2</sub> (1 atm); the reaction is stirred at room temperature and checked by means of TLC and GC-MS. After 24 hours Pd/C is filtered off on Celite and the amine is obtained by distillation under reduced pressure (T<sub>eb</sub> = 40°C, p = 8 · 10<sup>-2</sup> mbar) as a colourless liquid (7.5 g, 98%). <sup>1</sup>H NMR (200 MHz, CDCl<sub>3</sub>): δ = 0.90 (t, <sup>3</sup>J (H, H) = 7.0 Hz, 3H, N(CH<sub>2</sub>)<sub>3</sub>CH<sub>3</sub>), 1.25-1.52 (m, 4H, NCH<sub>2</sub>(CH<sub>2</sub>)<sub>2</sub>CH<sub>3</sub>), 2.60 (t, <sup>3</sup>J (H, H) = 6.6 Hz, 2H, NCH<sub>2</sub>(CH<sub>2</sub>)<sub>2</sub>CH<sub>3</sub>), 3.78 (s, 2H, NCH<sub>2</sub>-furan), 6.17 (d, <sup>3</sup>J (H, H) = 3.2 Hz, 1H, 3-H furan), 6.31 (dd, <sup>3</sup>J (H, H) = 1.8 Hz, <sup>3</sup>J (H, H) = 3.2 Hz, 1H, 4-H furan), 7.33 (d, <sup>3</sup>J (H, H) = 1.8 Hz, 1H, 5-H furan); GC rt 17.1 min; MS (70 eV, EI): m/z 153 (15) [M<sup>+</sup>]; 110 (30) [M<sup>+</sup> - CH<sub>3</sub>(CH<sub>2</sub>)<sub>2</sub>]; 96 (15) [M<sup>+</sup> - CH<sub>3</sub>(CH<sub>2</sub>)<sub>3</sub>]; 81 (100) [M<sup>+</sup> - CH<sub>3</sub>(CH<sub>2</sub>)<sub>3</sub>NH]; 53 (15).

**N-Octylfurfurylamine 6b.** The amine is prepared in 98% yield as a pale yellow oil after distillation under reduced pressure (T<sub>eb</sub> = 90°C, p = 7 · 10<sup>-2</sup> mbar) starting from imine **5b** as described for compound **6a**. <sup>1</sup>H NMR (400 MHz, CDCl<sub>3</sub>): δ = 0.87 (t, <sup>3</sup>J (H, H) = 6.4 Hz, 3H, N(CH<sub>2</sub>)<sub>7</sub>CH<sub>3</sub>), 1.26-1.27 (m, 10H, N(CH<sub>2</sub>)<sub>2</sub>(CH<sub>2</sub>)<sub>5</sub>CH<sub>3</sub>), 1.44-1.50 (m, 2H, NCH<sub>2</sub>CH<sub>2</sub>(CH<sub>2</sub>)<sub>5</sub>CH<sub>3</sub>), 2.59 (t, <sup>3</sup>J (H, H) = 6.8 Hz, 2H, NCH<sub>2</sub>(CH<sub>2</sub>)<sub>6</sub>CH<sub>3</sub>), 3.76 (s, 2H, NCH<sub>2</sub>-furan), 6.15 (d, <sup>3</sup>J (H, H) = 3.2 Hz, 1H, 3-H furan), 6.30 (dd, <sup>3</sup>J (H, H) = 2.2 Hz, <sup>3</sup>J (H, H) = 3.2 Hz, 1H, 4-H furan), 7.35 (d, <sup>3</sup>J (H, H) = 2.2 Hz, 1H, 5-H furan); GC rt 17.1 min; MS (70 eV, EI): m/z 209 (25) [M<sup>+</sup>]; 180 (5) [M<sup>+</sup> - CH<sub>3</sub>CH<sub>2</sub>]; 166 (5) [M<sup>+</sup> - CH<sub>3</sub>(CH<sub>2</sub>)<sub>2</sub>]; 152 (5) [M<sup>+</sup> - CH<sub>3</sub>(CH<sub>2</sub>)<sub>3</sub>]; 110 (100) [M<sup>+</sup> - CH<sub>3</sub>(CH<sub>2</sub>)<sub>6</sub>]; 96 (20) [M<sup>+</sup> - CH<sub>3</sub>(CH<sub>2</sub>)<sub>7</sub>]; 81 (100) [M<sup>+</sup> - CH<sub>3</sub>(CH<sub>2</sub>)<sub>7</sub>NH]; 53 (15).

**N-Hexylfurfurylamine 6c.** The amine is prepared in 95% yield as a pale yellow oil after distillation under reduced pressure (T<sub>eb</sub> = 70°C, p = 7 · 10<sup>-2</sup> mbar) starting from imine **5c** as described for compound **6a**. <sup>1</sup>H NMR (400 MHz, CDCl<sub>3</sub>): δ = 0.85 (t, <sup>3</sup>J (H, H) = 6.2 Hz, 3H, N(CH<sub>2</sub>)<sub>5</sub>CH<sub>3</sub>), 1.23-1.27 (m, 6H, N(CH<sub>2</sub>)<sub>2</sub>(CH<sub>2</sub>)<sub>3</sub>CH<sub>3</sub>), 1.47-1.52 (m, 2H, NCH<sub>2</sub>CH<sub>2</sub>(CH<sub>2</sub>)<sub>3</sub>CH<sub>3</sub>), 2.61 (t, <sup>3</sup>J (H, H) = 7.2 Hz, 2H, NCH<sub>2</sub>(CH<sub>2</sub>)<sub>4</sub>CH<sub>3</sub>), 3.77 (s, 2H, NCH<sub>2</sub>-furan), 6.19 (d, <sup>3</sup>J (H, H) =

3.0 Hz, 1H, 3-H furan), 6.32 (dd,  $^3J$ (H, H) = 2.2 Hz,  $^3J$ (H, H) = 3.0 Hz, 1H, 4-H furan), 7.34 (d,  $^3J$ (H, H) = 2.2 Hz, 1H, 5-H furan); GC rt 15.4 min; MS (70 eV, EI): m/z 181 (5) [ $M^+$ ]; 110 (40) [ $M^+$ -CH<sub>3</sub>(CH<sub>2</sub>)<sub>4</sub>]; 96 (10) [ $M^+$ -CH<sub>3</sub>(CH<sub>2</sub>)<sub>5</sub>]; 81 (100) [ $M^+$ -CH<sub>3</sub>(CH<sub>2</sub>)<sub>5</sub>NH]; 53 (10).

***N,N*-dibutylfurfurylamine 7a.** Freshly distilled amine **6a** (1.53 g, 10 mmol), K<sub>2</sub>CO<sub>3</sub> (1.38 g, 10 mmol) and bromobutane (1.07 cm<sup>3</sup>, 10 mmol) are charged in a two necked round bottom flask and stirred at room temperature for 24 hours. The reaction is monitored by GC-MS, when the conversion is completed, K<sub>2</sub>CO<sub>3</sub> is filtered off and the product is purified by distillation under reduced pressure ( $T_{eb}$  = 70°C,  $p$  = 8.10<sup>-2</sup> mbar) giving a pale yellow oil (1.24 g, 80%). <sup>1</sup>H NMR (400 MHz, CDCl<sub>3</sub>):  $\delta$  = 0.90 (m, 6H, 2  $\times$  CH<sub>3</sub>(CH<sub>2</sub>)<sub>3</sub>N), 1.27-1.33 (m, 4H, 2  $\times$  CH<sub>3</sub>CH<sub>2</sub>(CH<sub>2</sub>)<sub>2</sub>N), 1.43-1.49 (m, 4H, 2  $\times$  CH<sub>3</sub>CH<sub>2</sub>CH<sub>2</sub>CH<sub>2</sub>N), 2.42 (m, 4H, 2  $\times$  CH<sub>3</sub>(CH<sub>2</sub>)<sub>2</sub>CH<sub>2</sub>N), 3.64 (s, 2H, NCH<sub>2</sub>-furan), 6.15 (d,  $^3J$ (H, H) = 3.0 Hz, 1H, 3-H furan), 6.31 (dd,  $^3J$ (H, H) = 1.8 Hz,  $^3J$ (H, H) = 3.0 Hz, 1H, 4-H furan), 7.36 (d,  $^3J$ (H, H) = 1.8 Hz, 1H, 5-H furan); GC rt 20.6 min; MS (70 eV, EI): m/z 209 (10) [ $M^+$ ]; 166 (45) [ $M^+$ -CH<sub>3</sub>(CH<sub>2</sub>)<sub>2</sub>]; 81 (100) [ $M^+$ -CH<sub>3</sub>(CH<sub>2</sub>)<sub>3</sub>N CH<sub>3</sub>(CH<sub>2</sub>)<sub>3</sub>]; 53 (10).

***N*-butyl-*N*-dodecylfurfurylamine 7b** is obtained with the same procedure of **7a** starting from **6a** and bromododecane, 70% yield after flash chromatography (cyclohexane/AcOEt 8/2). <sup>1</sup>H NMR (200 MHz, CDCl<sub>3</sub>):  $\delta$  = 0.86-0.94 (m, 6H, CH<sub>3</sub>(CH<sub>2</sub>)<sub>11</sub>N, CH<sub>3</sub>(CH<sub>2</sub>)<sub>3</sub>N), 1.26-1.35 (m, 20H, CH<sub>3</sub>(CH<sub>2</sub>)<sub>9</sub>(CH<sub>2</sub>)<sub>2</sub>N, CH<sub>3</sub>CH<sub>2</sub>(CH<sub>2</sub>)<sub>2</sub>N), 1.50-1.52 (m, 4H, CH<sub>3</sub>(CH<sub>2</sub>)<sub>9</sub>CH<sub>2</sub>CH<sub>2</sub>N, CH<sub>3</sub>CH<sub>2</sub>CH<sub>2</sub>CH<sub>2</sub>N), 2.44-2.49 (m, 4H, CH<sub>3</sub>(CH<sub>2</sub>)<sub>10</sub>CH<sub>2</sub>N, CH<sub>3</sub>(CH<sub>2</sub>)<sub>3</sub>CH<sub>2</sub>N), 3.72 (s, 2H, NCH<sub>2</sub>-furan), 6.22 (d,  $^3J$ (H, H) = 3.2 Hz, 1H, 3-H furan), 6.33 (dd,  $^3J$ (H, H) = 2.2 Hz,  $^3J$ (H, H) = 3.2 Hz, 1H, 4-H furan), 7.38 (d,  $^3J$ (H, H) = 2.2 Hz, 1H, 5-H furan); GC rt 26.5 min; MS (70 eV, EI): m/z 321

(10) [ $M^+$ ]; 278 (40) [ $M^+$ -CH<sub>3</sub>(CH<sub>2</sub>)<sub>2</sub>]; 166 (65) [ $M^+$ -CH<sub>3</sub>(CH<sub>2</sub>)<sub>10</sub>]; 81 (100) [ $M^+$ -CH<sub>3</sub>(CH<sub>2</sub>)<sub>11</sub>N CH<sub>3</sub>(CH<sub>2</sub>)<sub>3</sub>].

***N*-Butyl-*N*-octylfurfurylamine 7c.** The amine **7c** is prepared from amine **6b** with the same procedure described for compound **7a**, obtained as a pale yellow oil in 90% yield after distillation under reduced pressure ( $T_{eb}$  = 100°C,  $p$  = 9 10<sup>-2</sup> mbar). <sup>1</sup>H NMR (400 MHz, CDCl<sub>3</sub>):  $\delta$  = 0.86 (t,  $^3J$ (H, H) = 6.4 Hz, 3H, CH<sub>3</sub>(CH<sub>2</sub>)<sub>7</sub>N), 0.93 (t,  $^3J$ (H, H) = 7.2 Hz, 3H, N(CH<sub>2</sub>)<sub>3</sub>CH<sub>3</sub>), 1.24-1.36 (m, 12H, CH<sub>3</sub>(CH<sub>2</sub>)<sub>5</sub>(CH<sub>2</sub>)<sub>2</sub>N, CH<sub>3</sub>CH<sub>2</sub>(CH<sub>2</sub>)<sub>2</sub>N), 1.75-1.79 (m, 4H, CH<sub>3</sub>(CH<sub>2</sub>)<sub>5</sub>CH<sub>2</sub>CH<sub>2</sub>N, CH<sub>3</sub>CH<sub>2</sub>CH<sub>2</sub>CH<sub>2</sub>N), 2.72-2.77 (m, 4H, CH<sub>3</sub>(CH<sub>2</sub>)<sub>6</sub>CH<sub>2</sub>N, CH<sub>3</sub>(CH<sub>2</sub>)<sub>2</sub>CH<sub>2</sub>N), 4.08 (s, 2H, NCH<sub>2</sub>-furan), 6.40 (dd,  $^3J$ (H, H) = 1.8 Hz,  $^3J$ (H, H) = 3.2 Hz, 1H, 3-H furan), 6.52 (d,  $^3J$ (H, H) = 3.2 Hz, 1H, 4-H furan), 7.45 (d,  $^3J$ (H, H) = 1.8 Hz, 1H, 5-H furan); GC rt 20.3 min; MS (70 eV, EI): m/z 265 (10) [ $M^+$ ]; 222 (30) [ $M^+$ -CH<sub>3</sub>(CH<sub>2</sub>)<sub>2</sub>]; 166 (50) [ $M^+$ -CH<sub>3</sub>(CH<sub>2</sub>)<sub>6</sub>]; 81 (100) [ $M^+$ -CH<sub>3</sub>(CH<sub>2</sub>)<sub>3</sub>N CH<sub>3</sub>(CH<sub>2</sub>)<sub>7</sub>], 53 (5).

***N*-Dodecyl-*N*-octyl-furfuryl amine 7d.** The amine is prepared from octyl-furfuryl amine **6b** as described for compound **7b**, in a 70% yield. <sup>1</sup>H NMR (400 MHz, CDCl<sub>3</sub>):  $\delta$  = 0.85-0.88 (m, 6H, CH<sub>3</sub>(CH<sub>2</sub>)<sub>11</sub>N, CH<sub>3</sub>(CH<sub>2</sub>)<sub>7</sub>N), 1.24-1.28 (m, 28H, CH<sub>3</sub>(CH<sub>2</sub>)<sub>9</sub>(CH<sub>2</sub>)<sub>2</sub>N, CH<sub>3</sub>(CH<sub>2</sub>)<sub>5</sub>(CH<sub>2</sub>)<sub>2</sub>N), 1.71-1.73 (m, 4H, CH<sub>3</sub>(CH<sub>2</sub>)<sub>9</sub>CH<sub>2</sub>CH<sub>2</sub>N, CH<sub>3</sub>(CH<sub>2</sub>)<sub>5</sub>CH<sub>2</sub>CH<sub>2</sub>N), 2.67 (m, 4H, CH<sub>3</sub>(CH<sub>2</sub>)<sub>10</sub>CH<sub>2</sub>N, CH<sub>3</sub>(CH<sub>2</sub>)<sub>6</sub>CH<sub>2</sub>N), 4.00 (s, 2H, NCH<sub>2</sub>-furan), 6.38 (dd,  $^3J$ (H, H) = 1.6 Hz,  $^3J$ (H, H) = 3.2 Hz, 1H, 4-H furan), 6.38 (d,  $^3J$ (H, H) = 3.2 Hz, 1H, 3-H furan), 7.43 (d,  $^3J$ (H, H) = 1.6 Hz, 1H, 5-H furan); GC rt 27.3; MS (70 eV, EI): m/z 377 (10) [ $M^+$ ]; 278 (75) [ $M^+$ -CH<sub>3</sub>(CH<sub>2</sub>)<sub>6</sub>]; 264 (10) [ $M^+$ -CH<sub>3</sub>(CH<sub>2</sub>)<sub>7</sub>]; 222 (80) [ $M^+$ -CH<sub>3</sub>(CH<sub>2</sub>)<sub>10</sub>]; 208 (10) [ $M^+$ -CH<sub>3</sub>(CH<sub>2</sub>)<sub>11</sub>]; 81 (100) [ $M^+$ -CH<sub>3</sub>(CH<sub>2</sub>)<sub>11</sub>N CH<sub>3</sub>(CH<sub>2</sub>)<sub>7</sub>].

**Figure 1.** Relationship between quaternary ammonium salts concentration in water and number of active individuals of *Daphnia magna*, after a 48 h exposure. Points: observed values (mean of two replicates); lines: logistic model fitted to the observed data.

**Fig. 1**

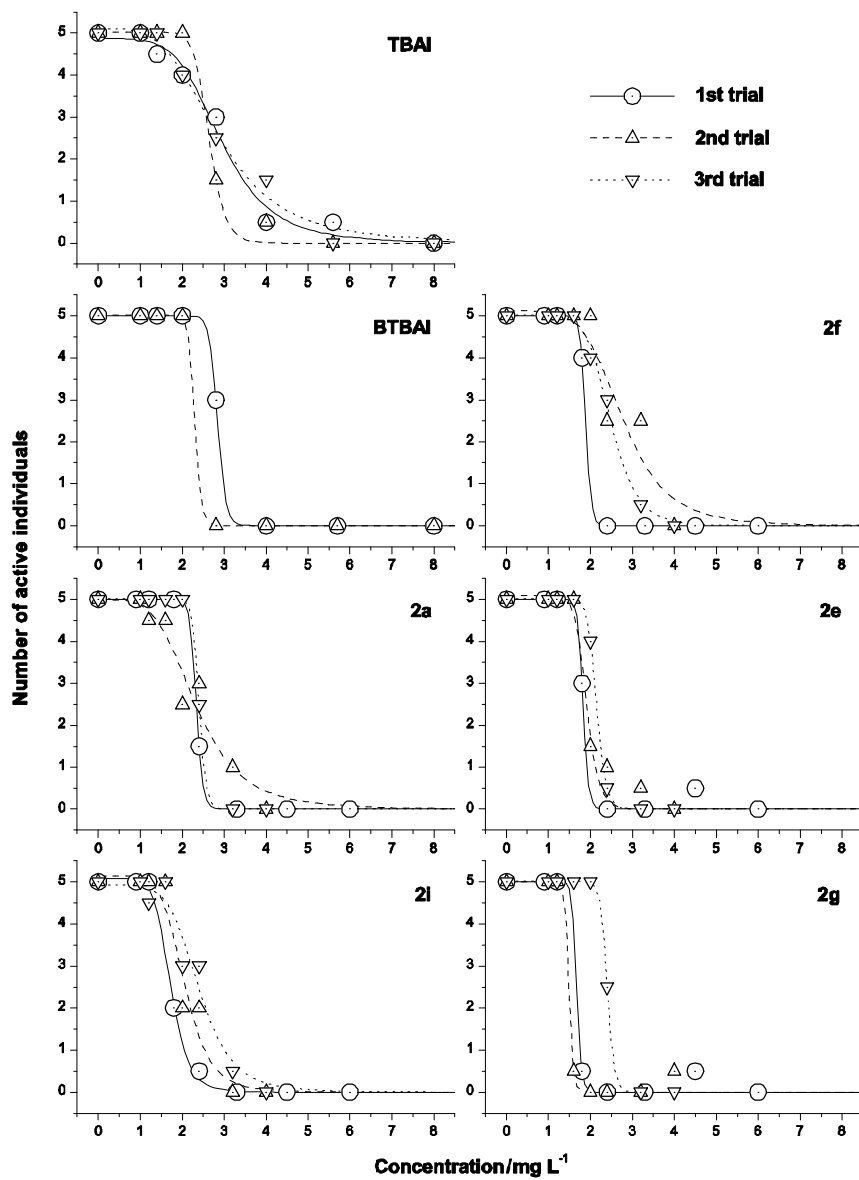

Figure 2. Relationship between quaternary ammonium salts concentration in water and bioluminescence of *Vibrio fischeri*, after a 15 min exposure. Points: observed values; lines: logistic model fitted to the observed data.

Fig. 2

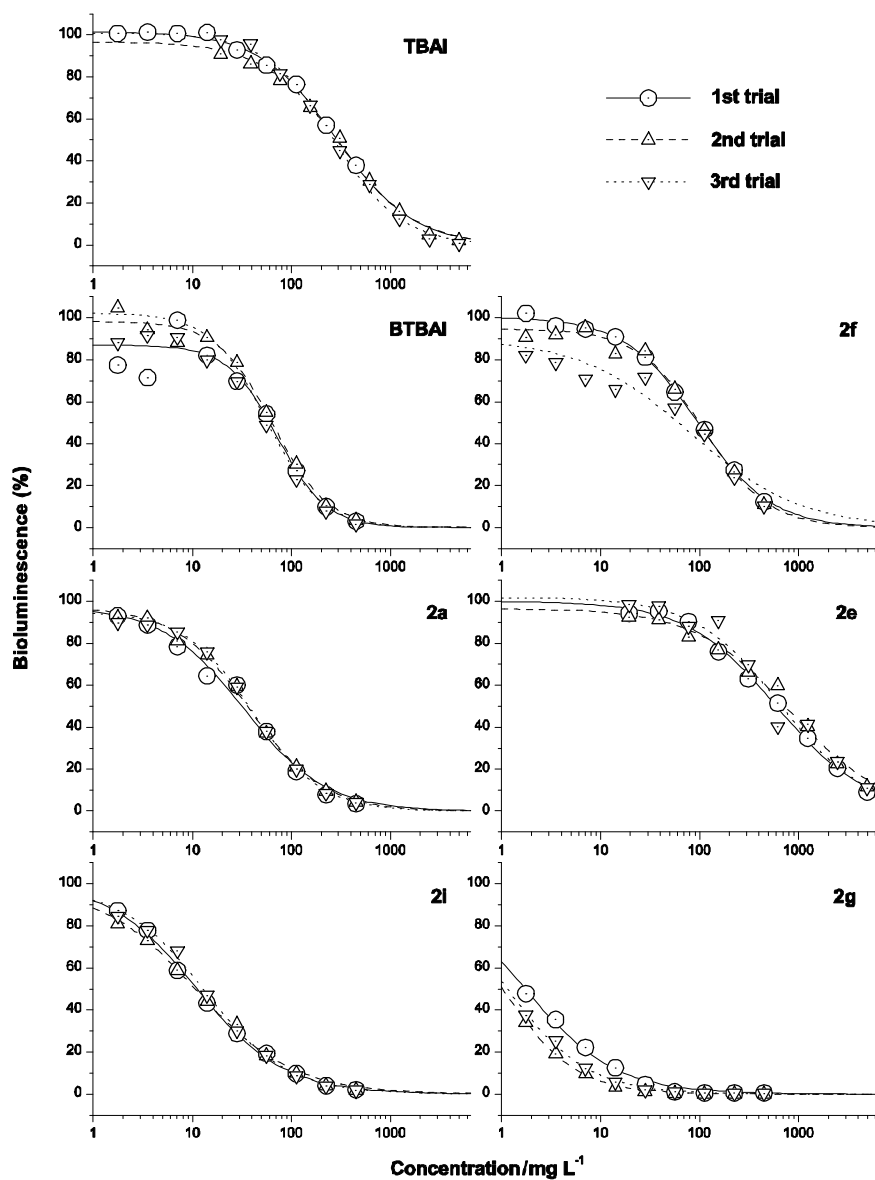

Supplement: b902855b.pdf [file b902855b.pdf]
